# Supplementary material
Source: HighWire-hosted journal article supplement (https://hw-f5-jim.highwire.org/content/69/5/1027)

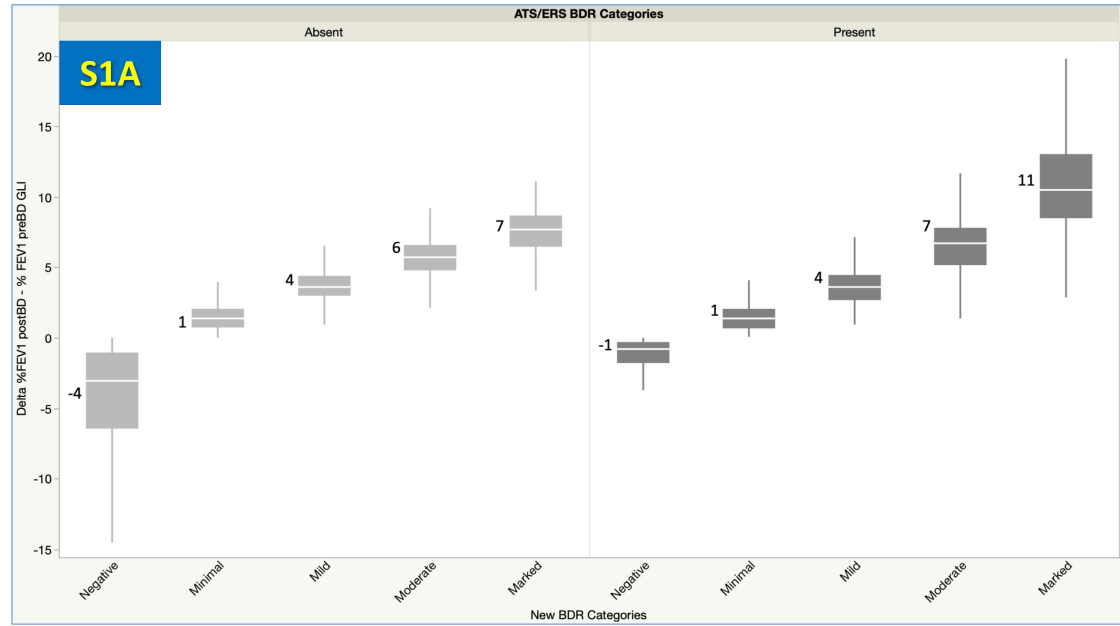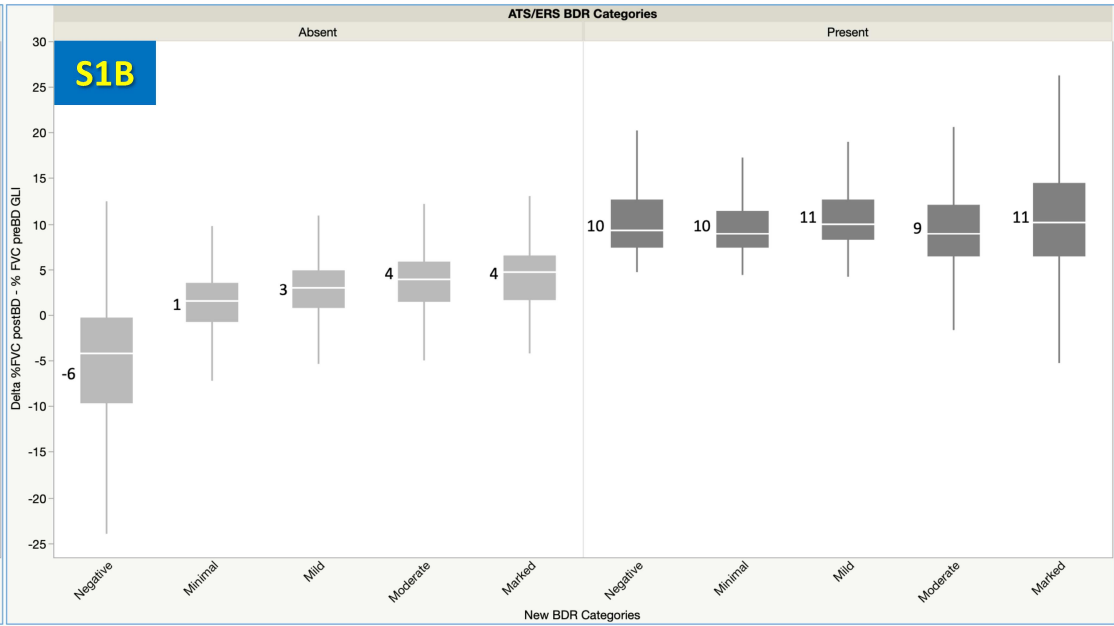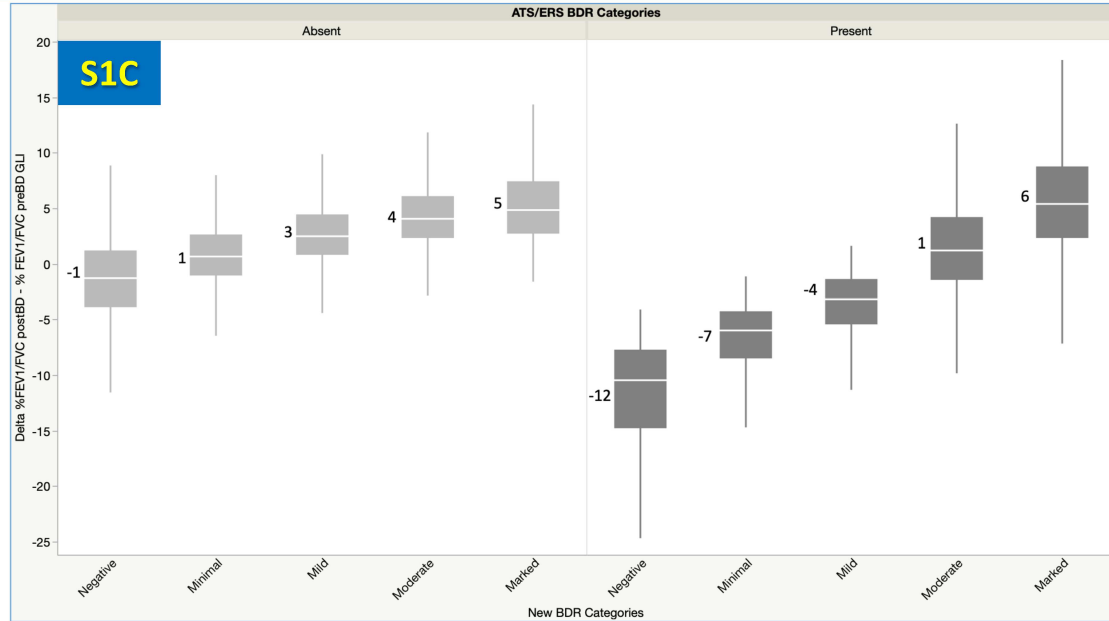

Supplement: inline-supplementary-material-3 [file inline-supplementary-material-3.pdf]
